# Supplementary material
Source: PubMed Central journal article supplement (PMC4442443)
Supplement: JVI.03127-14_zjv999090437so1.pdf [file JVI.03127-14_zjv999090437so1.pdf]

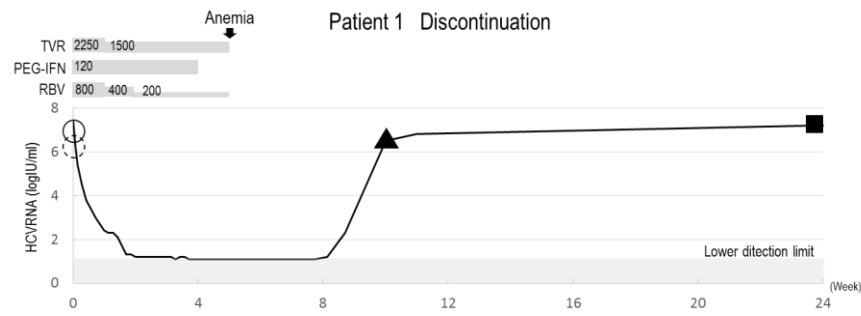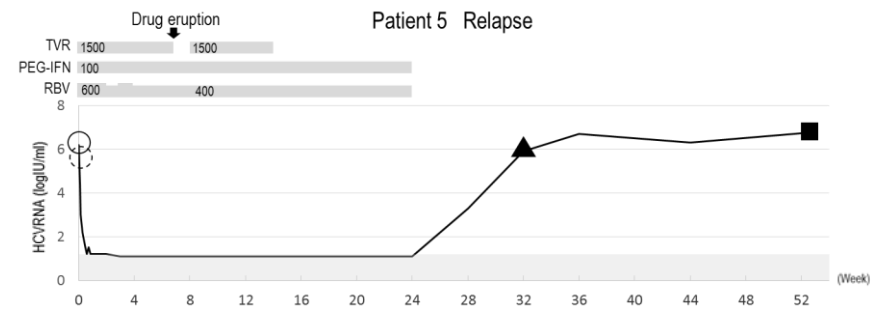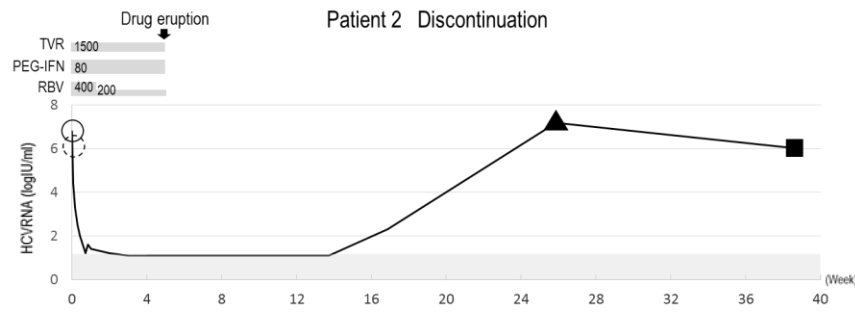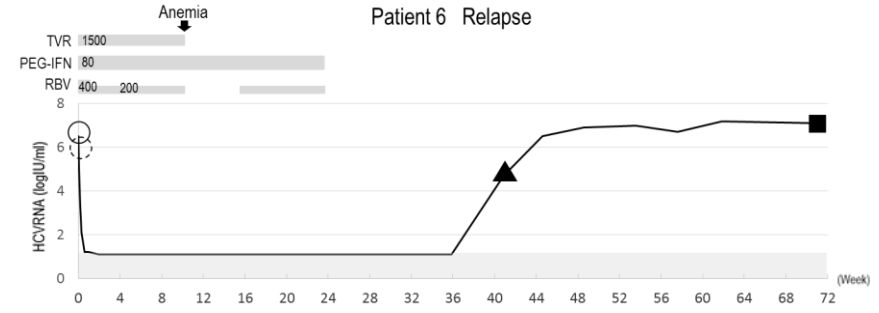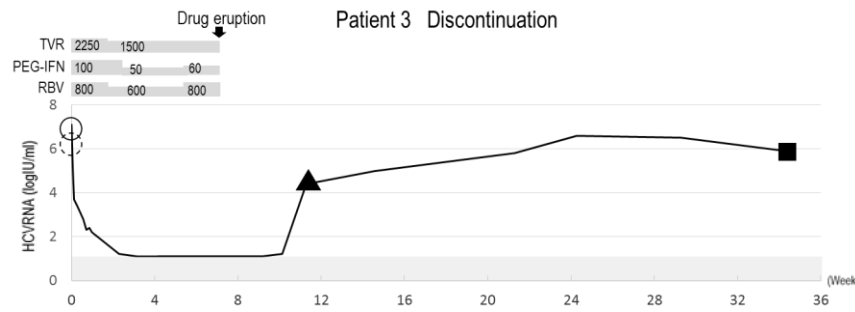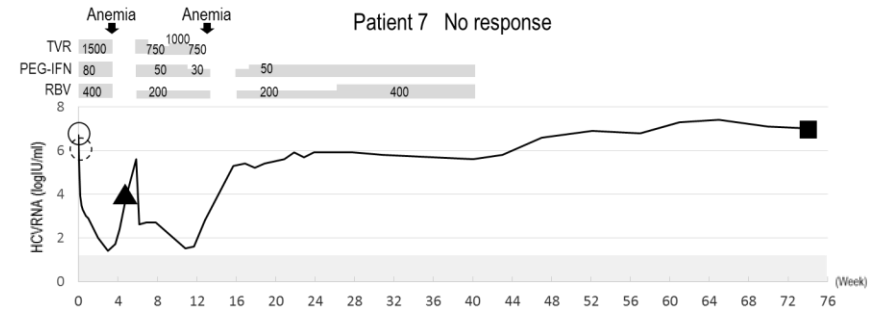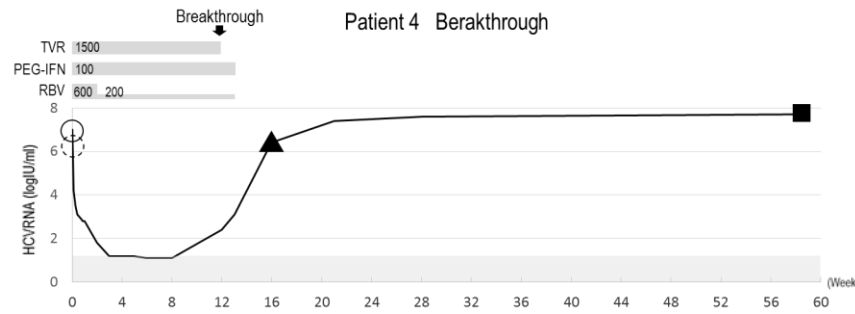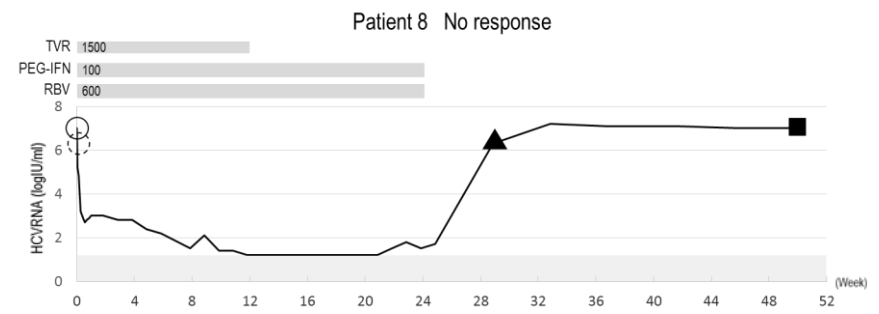

○ Baseline → ⌚ 12 h → ▲ Re-elevation → ■ Last observation

Clinical courses of each non-SVR patient and time points for serum sample collection for deep sequencing.

## Patient 1

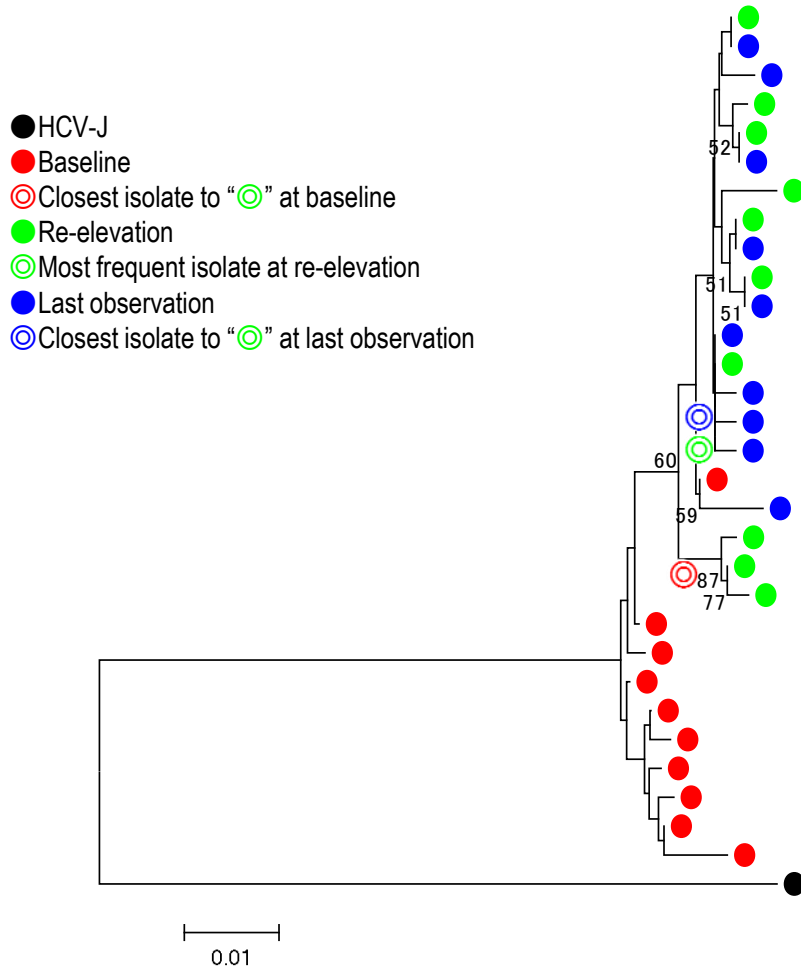

## Patient 2

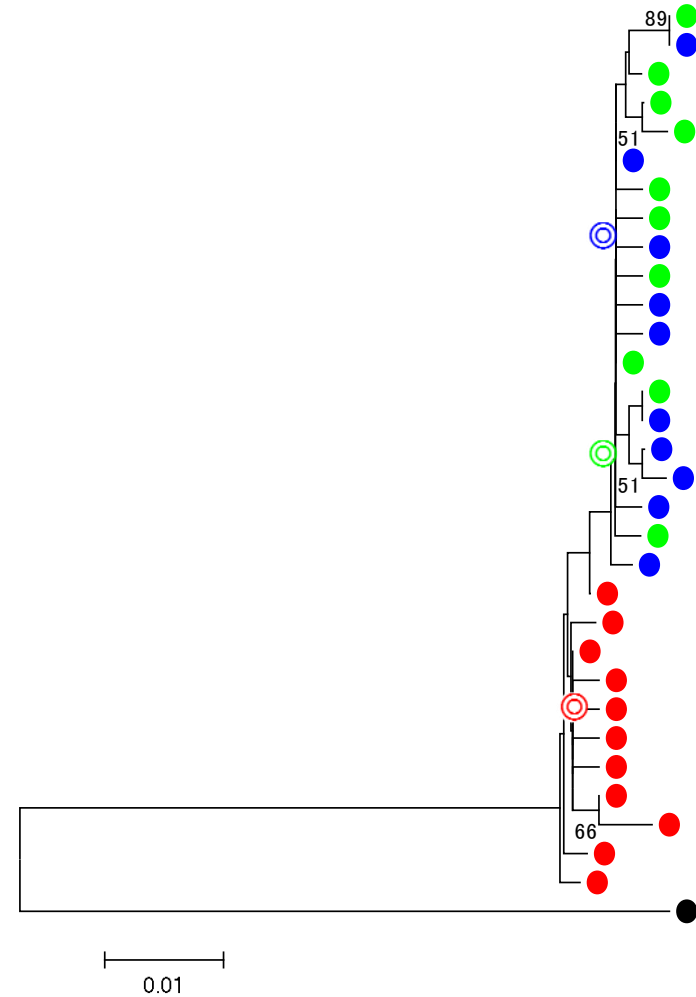

A|B

Small-scale phylogenetic trees were reconstructed using the top 10 most populated isolates at baseline, re-elevation, and the last observation in each non-SVR patient and bootstrap values of 50 or more are demonstrated in the phylogenetic trees. The isolate closest to the most frequent isolate found at re-elevation is indicated by the mark “◎” at each time point. Red circles, green circles, and blue circles, respectively, indicate isolates at baseline, at viral RNA re-elevation, and at the last observation.

Patient 3

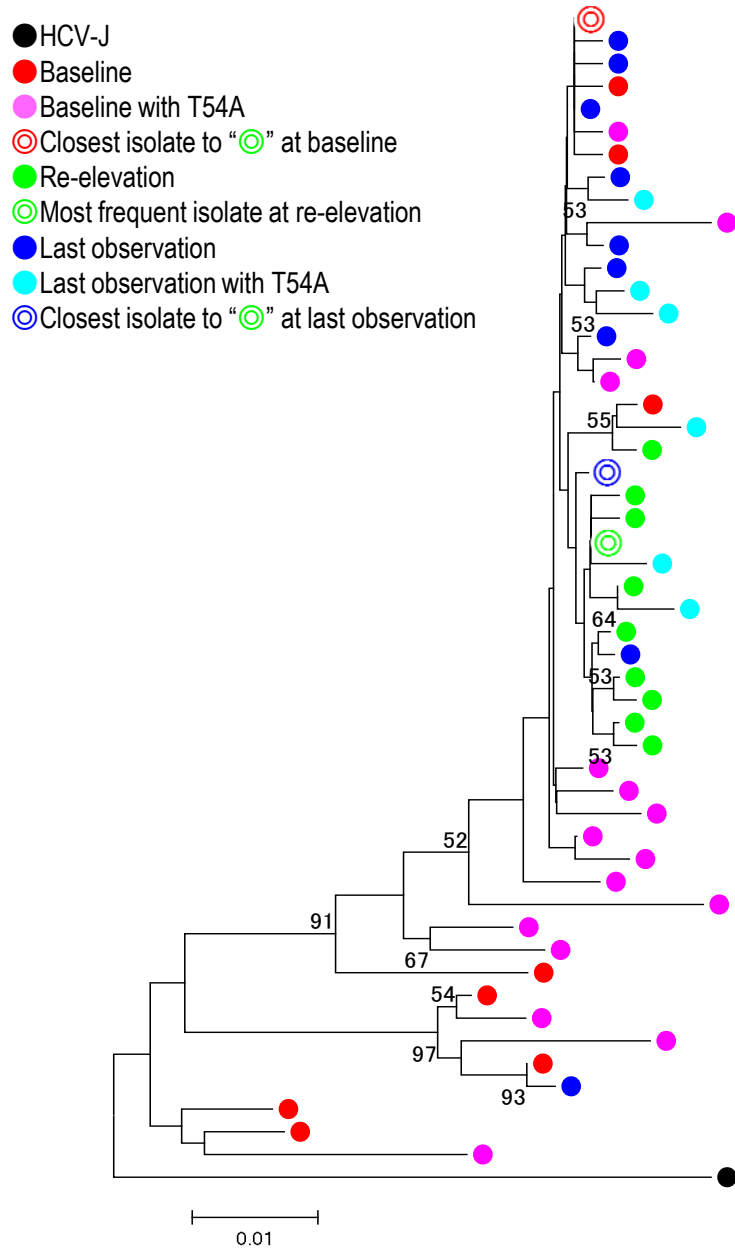

Patient 4

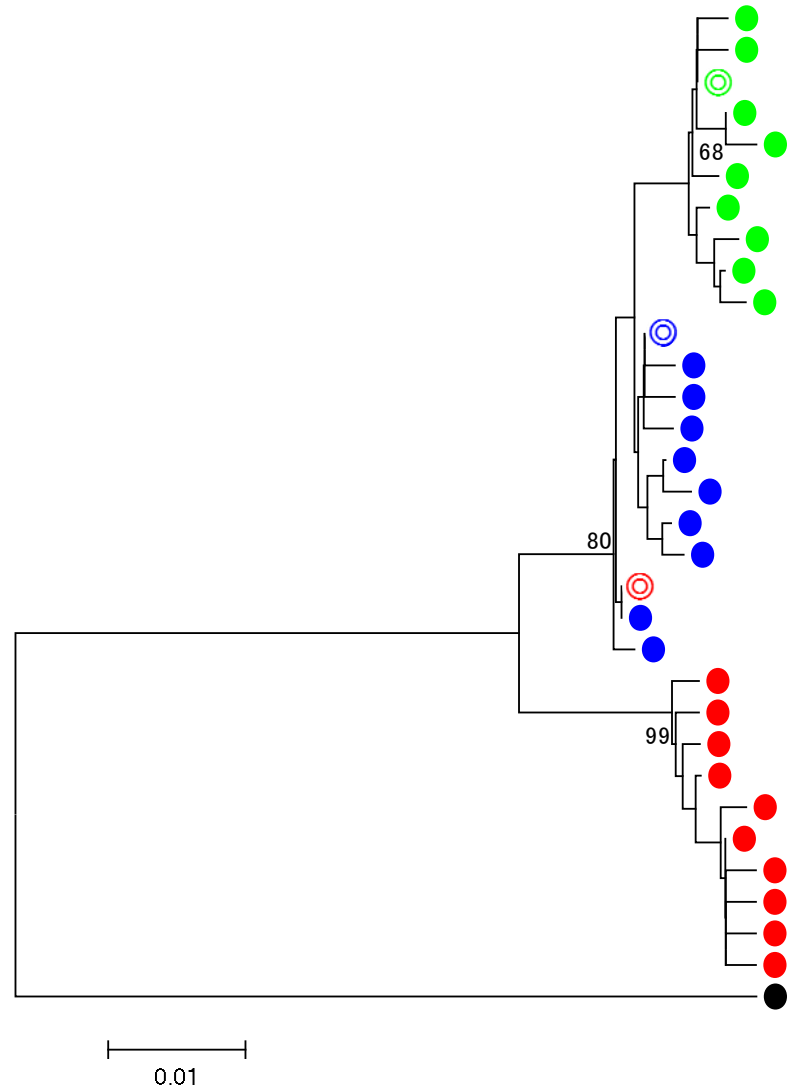

$c|D$

Patient 5

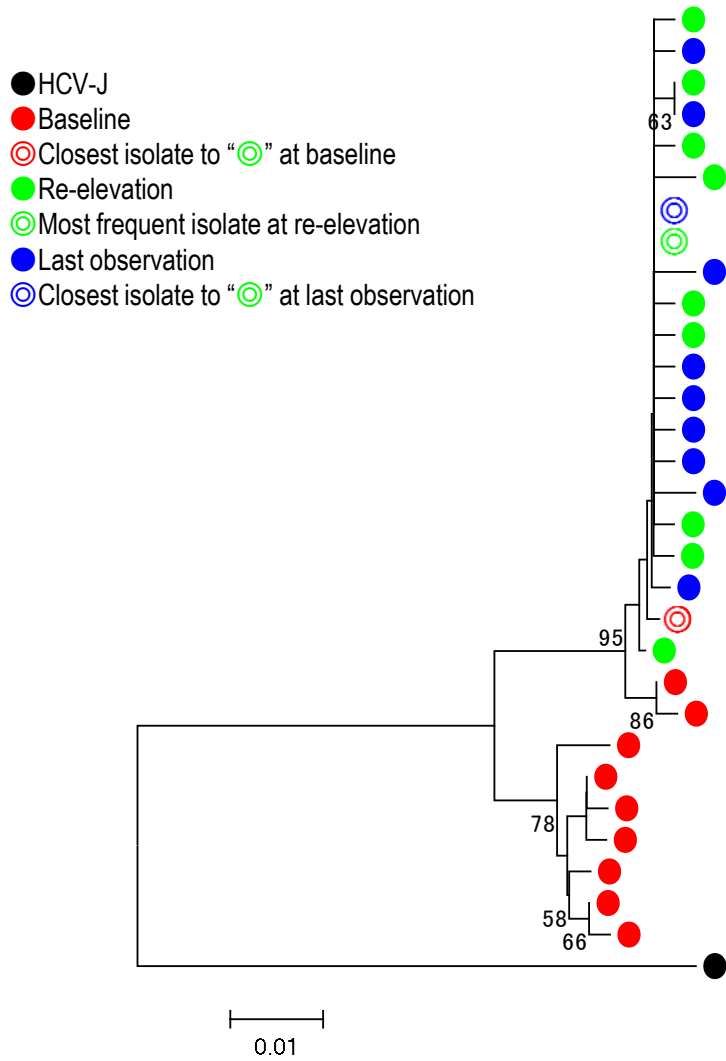

Patient 6

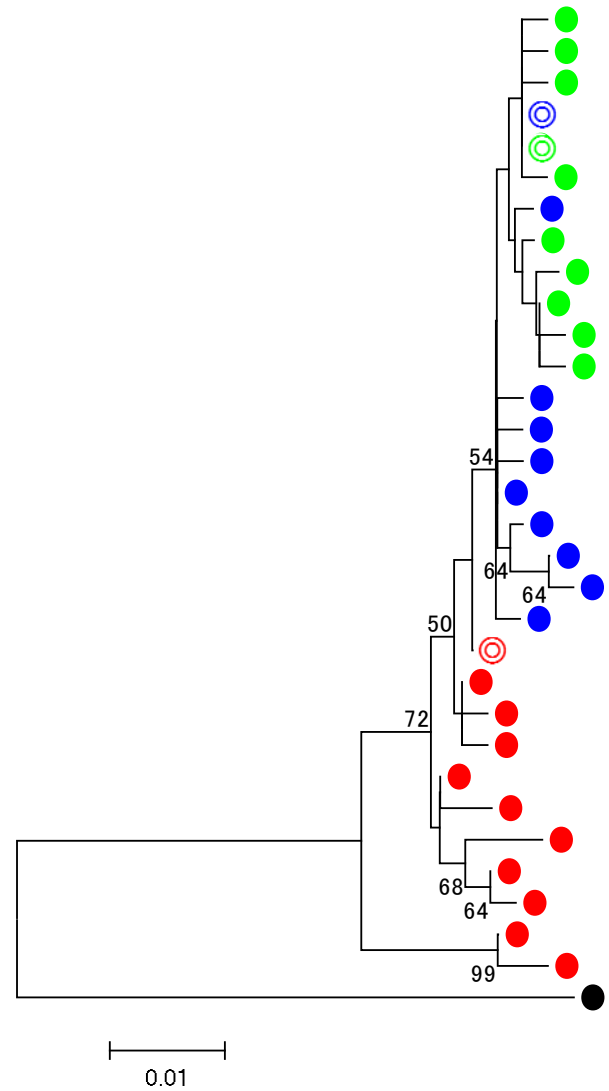

Patient 7

- HCV-J
- Baseline
- Baseline with T54A
- Closest isolate to "○" at baseline
- Re-elevation
- Most frequent isolate at re-elevation
- Last observation
- Last observation with T54A
- Closest isolate to "○" at last observation

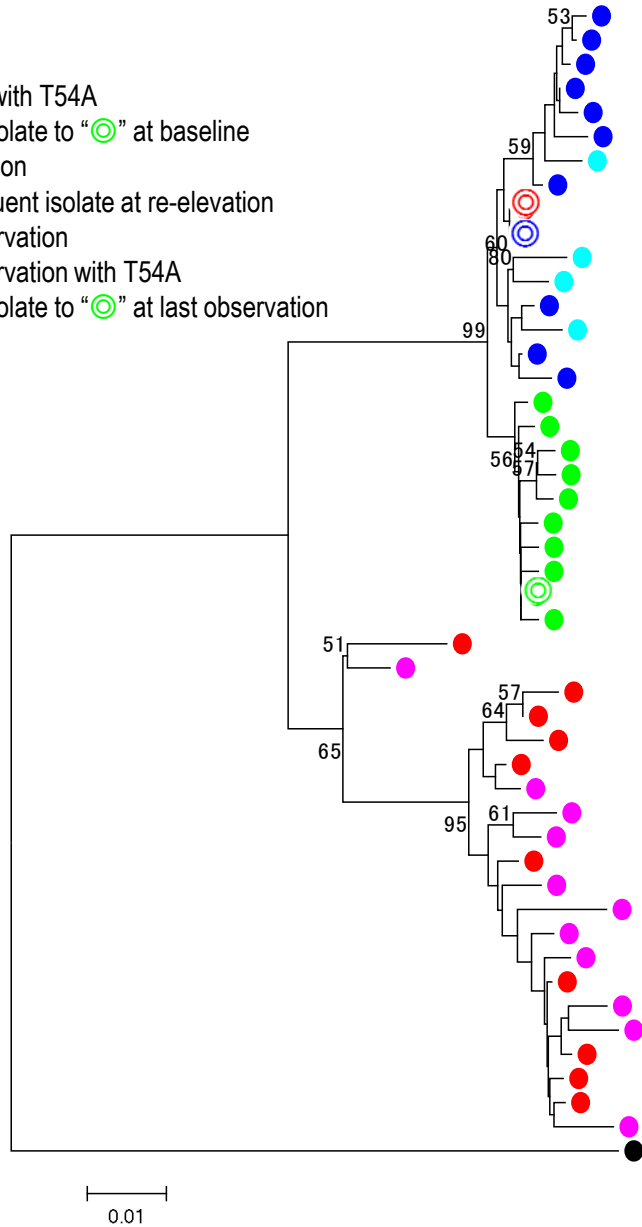

Patient 8

G|H

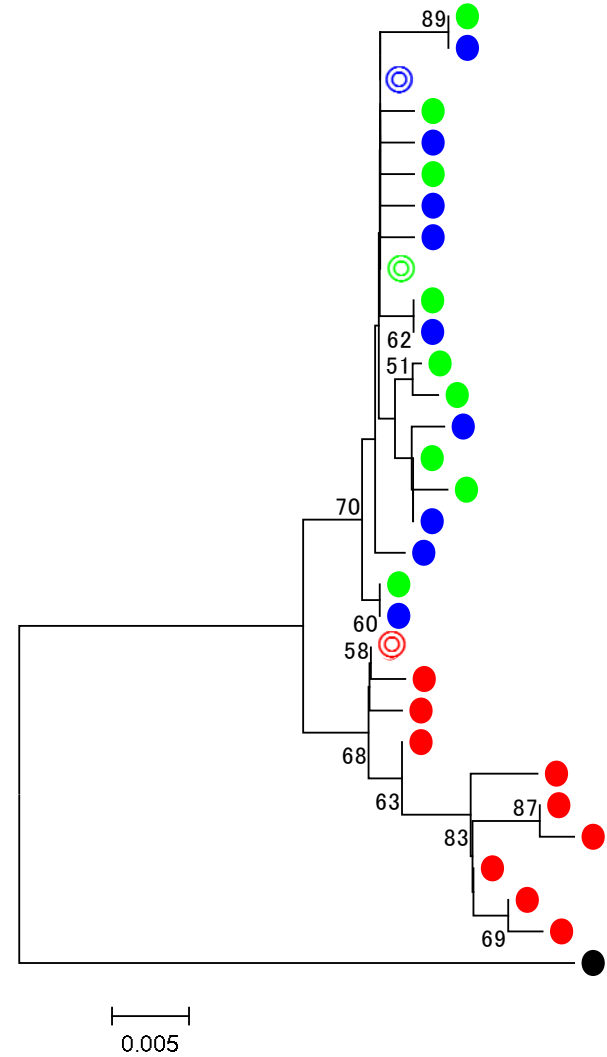

| 5'→3'            |                                                             | 1st primers          | 5'→3'                                                         |  |
|------------------|-------------------------------------------------------------|----------------------|---------------------------------------------------------------|--|
| Sense            | ATC(A/G)TCACTAGCCTCAC(A/G)GG                                | Antisense            | AATGTCTGCGGTAC(G/A)GCCGG                                      |  |
| 5'→3'            |                                                             | 2nd primers          | 5'→3'                                                         |  |
| Sense-Barcode 1  | CGTATCGCCTCCCTCGCGCCATCAGACGAGTGCGTAGCCTTACAGGTCGGGACAAGAA  | Antisense-Barcode 1  | CTATGCGCCTTGCCAGCCCCTCAGACGAGTGCGTCGTGAAGACCCGGAGACCCGCAT     |  |
| Sense-Barcode 2  | CGTATCGCCTCCCTCGCGCCATCAGACGCTCGACAAGCCTTACAGGTCGGGACAAGAA  | Antisense-Barcode 2  | CTATGCGCCTTGCCAGCCCCTCAGACGCTCGACACGTGAAGACCCGGAGACCCGCAT     |  |
| Sense-Barcode 3  | CGTATCGCCTCCCTCGCGCCATCAGAGACGCACTCAGCCTTACAGGTCGGGACAAGAA  | Antisense-Barcode 3  | CTATGCGCCTTGCCAGCCCCTCAGAGACGCACTCCGTGAAGACCCGGAGACCCGCAT     |  |
| Sense-Barcode 4  | CGTATCGCCTCCCTCGCGCCATCAGAGCACTGTAGAGCCTTACAGGTCGGGACAAGAA  | Antisense-Barcode 4  | CTATGCGCCTTGCCAGCCCCTCAGAGCACTGTAGCGTGAAGACCCGGAGACCCGCAT     |  |
| Sense-Barcode 5  | CGTATCGCCTCCCTCGCGCCATCAGATCAGACACGAGCCTTACAGGTCGGGACAAGAA  | Antisense-Barcode 5  | CTATGCGCCTTGCCAGCCCCTCAGATCAGACACGCGTGAAGACCCGGAGACCCGCAT     |  |
| Sense-Barcode 6  | CGTATCGCCTCCCTCGCGCCATCAGATATCGCGAGAGCCTTACAGGTCGGGACAAGAA  | Antisense-Barcode 6  | CTATGCGCCTTGCCAGCCCCTCAGATATCGCGAGCGTGAAGACCCGGAGACCCGCAT     |  |
| Sense-Barcode 7  | CGTATCGCCTCCCTCGCGCCATCAGCGTGTCTCTAAGCCTTACAGGTCGGGACAAGAA  | Antisense-Barcode 7  | CTATGCGCCTTGCCAGCCCCTCAGCGTGTCTCTACGTGAAGACCCGGAGACCCGCAT     |  |
| Sense-Barcode 8  | CGTATCGCCTCCCTCGCGCCATCAGCTCGCGTGTACAGCCTTACAGGTCGGGACAAGAA | Antisense-Barcode 8  | CTATGCGCCTTGCCAGCCCCTCAGCTCGCGTGTCCGTGAAGACCCGGAGACCCGCAT     |  |
| Sense-Barcode 9  | CGTATCGCCTCCCTCGCGCCATCAGTAGTATCAGCAGCCTTACAGGTCGGGACAAGAA  | Antisense-Barcode 9  | CTATGCGCCTTGCCAGCCCCTCAGTAGTATCAGCCGTGAAGACCCGGAGACCCGCAT     |  |
| Sense-Barcode 10 | CGTATCGCCTCCCTCGCGCCATCAGTCTCTATGCGAGCCTTACAGGTCGGGACAAGAA  | Antisense-Barcode 10 | CTATGCGCCTTGCCAGCCCCTCAGTCTCTATGCGCGTGAAGACCCGGAGACCCGCAT     |  |
| Sense-Barcode 11 | CGTATCGCCTCCCTCGCGCCATCAGTGATACGTCTAGCCTTACAGGTCGGGACAAGAA  | Antisense-Barcode 11 | CTATGCGCCTTGCCAGCCCCTCAGTGATACGTCTCGTGAAGACCCGGAGACCCGCAT     |  |
| Sense-Barcode 12 | CGTATCGCCTCCCTCGCGCCATCAGTACTGAGCTAAGCCTTACAGGTCGGGACAAGAA  | Antisense-Barcode 12 | CTATGCGCCTTGCCAGCCCCTCAGTACTGAGCTACGTGAAGACCCGGAGACCCGCAT     |  |
| Sense-Barcode 13 | CGTATCGCCTCCCTCGCGCCATCAGCATAGTAGTGAGCCTTACAGGTCGGGACAAGAA  | Antisense-Barcode 13 | CTATGCGCCTTGCCAGCCCCTCAGCATAGTAGTGCCTGAAGACCCGGAGACCCGCAT     |  |
| Sense-Barcode 14 | CGTATCGCCTCCCTCGCGCCATCAGCGAGAGATACAGCCTTACAGGTCGGGACAAGAA  | Antisense-Barcode 14 | CTATGCGCCTTGCCAGCCCCTCAGCGAGAGATACCGTGAAGACCCGGAGACCCGCAT     |  |
| Sense-Barcode 15 | CGTATCGCCTCCCTCGCGCCATCAGATACGACGTAAGCCTTACAGGTCGGGACAAGAA  | Antisense-Barcode 15 | CTATGCGCCTTGCCAGCCCCTCAGATACGACTACGTGAAGACCCGGAGACCCGCAT      |  |
| Sense-Barcode 16 | CGTATCGCCTCCCTCGCGCCATCAGTCACGTAAGCCTTACAGGTCGGGACAAGAA     | Antisense-Barcode 16 | CTATGCGCCTTGCCAGCCCCTCAGTCACGTAAGCCTTACGTGAAGACCCGGAGACCCGCAT |  |
| Sense-Barcode 17 | CGTATCGCCTCCCTCGCGCCATCAGCGTCTAGTACAGCCTTACAGGTCGGGACAAGAA  | Antisense-Barcode 17 | CTATGCGCCTTGCCAGCCCCTCAGCGTCTAGTACCGTGAAGACCCGGAGACCCGCAT     |  |
| Sense-Barcode 18 | CGTATCGCCTCCCTCGCGCCATCAGTCTACGTAGCAGCCTTACAGGTCGGGACAAGAA  | Antisense-Barcode 18 | CTATGCGCCTTGCCAGCCCCTCAGTCTACGTAGCCGTGAAGACCCGGAGACCCGCAT     |  |
| Sense-Barcode 19 | CGTATCGCCTCCCTCGCGCCATCAGTGTACTACTCAGCCTTACAGGTCGGGACAAGAA  | Antisense-Barcode 19 | CTATGCGCCTTGCCAGCCCCTCAGTGTACTACTCCGTGAAGACCCGGAGACCCGCAT     |  |
| Sense-Barcode 20 | CGTATCGCCTCCCTCGCGCCATCAGACGACTACAGAGCCTTACAGGTCGGGACAAGAA  | Antisense-Barcode 20 | CTATGCGCCTTGCCAGCCCCTCAGACGACTACAGCGTGAAGACCCGGAGACCCGCAT     |  |
| Sense-Barcode 21 | CGTATCGCCTCCCTCGCGCCATCAGCGTAGACTAGAGCCTTACAGGTCGGGACAAGAA  | Antisense-Barcode 21 | CTATGCGCCTTGCCAGCCCCTCAGCGTAGACTAGCGTGAAGACCCGGAGACCCGCAT     |  |
| Sense-Barcode 22 | CGTATCGCCTCCCTCGCGCCATCAGTACAGATAGAGCCTTACAGGTCGGGACAAGAA   | Antisense-Barcode 22 | CTATGCGCCTTGCCAGCCCCTCAGTACAGATAGCGTGAAGACCCGGAGACCCGCAT      |  |
| Sense-Barcode 23 | CGTATCGCCTCCCTCGCGCCATCAGTACTCTCGTGAGCCTTACAGGTCGGGACAAGAA  | Antisense-Barcode 23 | CTATGCGCCTTGCCAGCCCCTCAGTACTCTCGTGCCTGAAGACCCGGAGACCCGCAT     |  |
| Sense-Barcode 24 | CGTATCGCCTCCCTCGCGCCATCAGTAGAGACGAGAGCCTTACAGGTCGGGACAAGAA  | Antisense-Barcode 24 | CTATGCGCCTTGCCAGCCCCTCAGTAGAGACGAGCGTGAAGACCCGGAGACCCGCAT     |  |
